# Supplementary material
Source: Springer Nature journal article supplement (https://www.springermedizin.de/resource/supplementary/12963_2011_150_MOESM1_ESM.pdf/9572770)

Kappa versus total absolute CSMF error for method 1

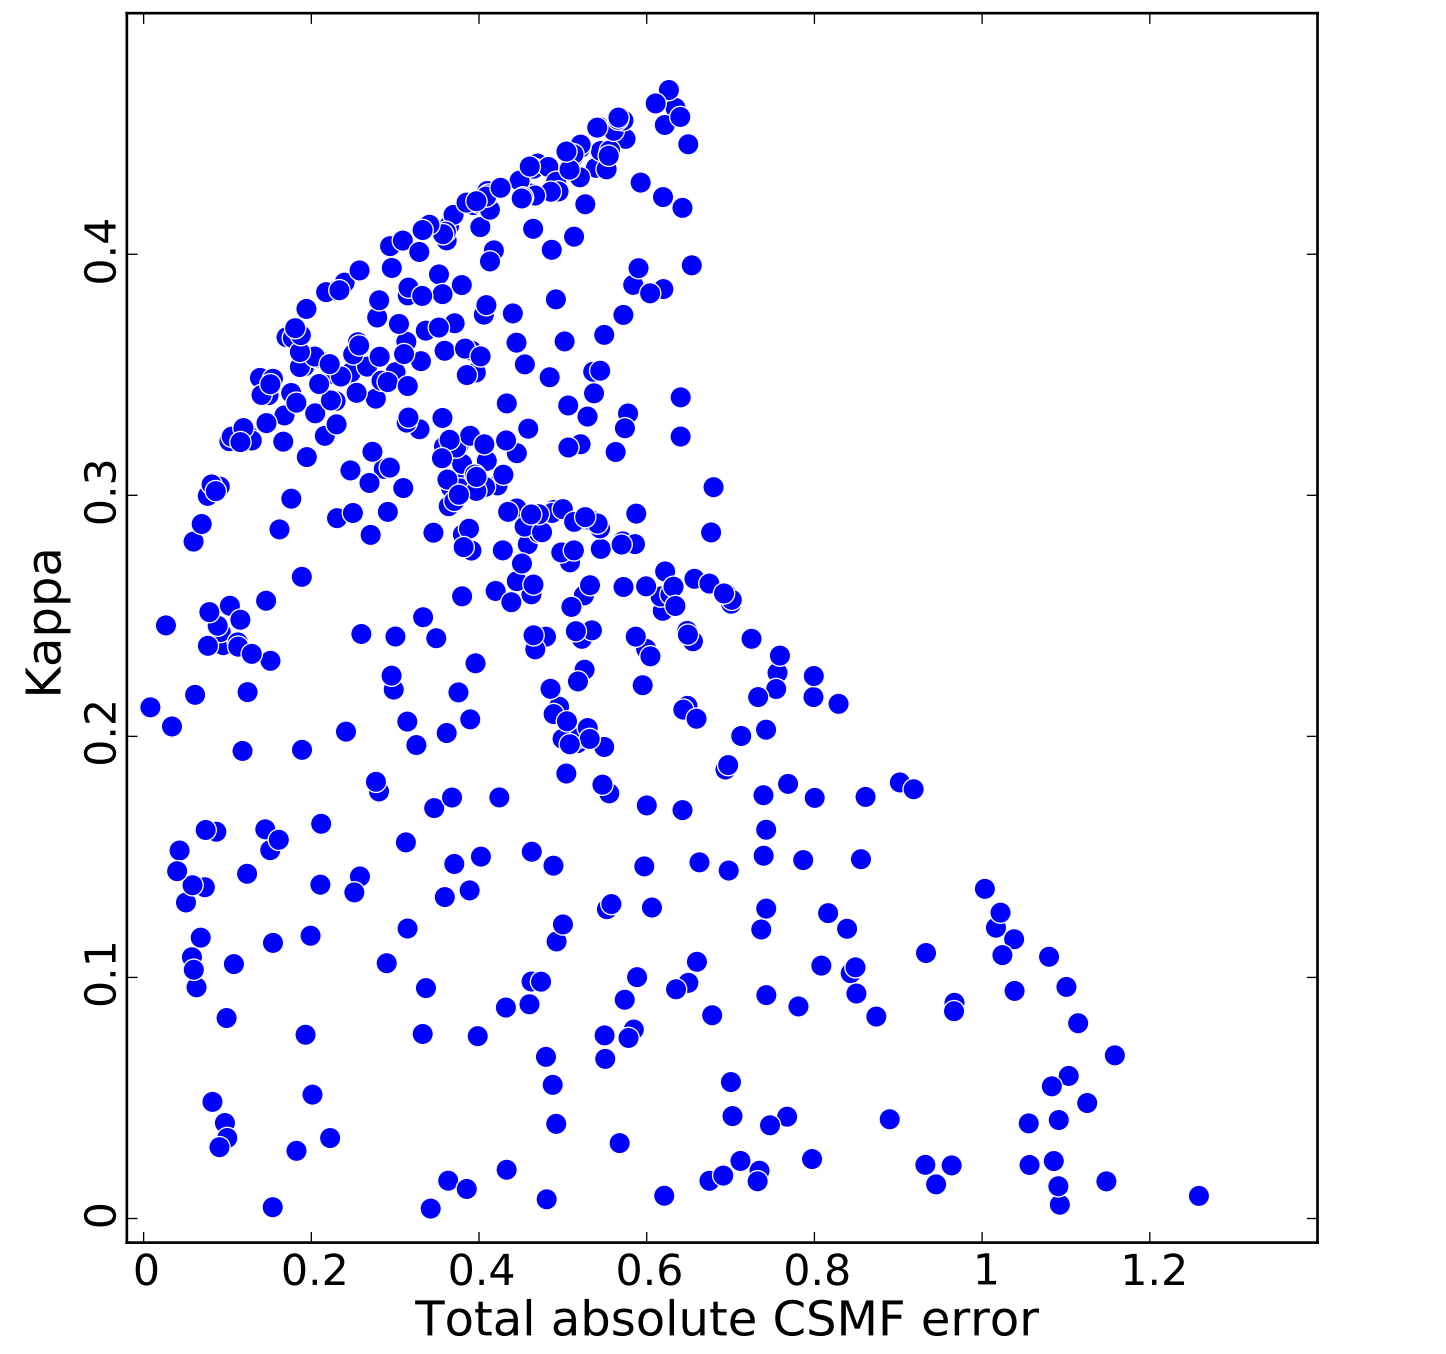

Supplement: MOESM1 [file 9572770]
